# Supplementary material for: Identification of epigenetic factor KAT2B gene variants for possible roles in congenital heart diseases
Source: PubMed Central journal article supplement (PMC7160239; doi:10.1042/bsr20191779), 2020-04-15
Supplement: BSR-2019-1779_supp.pdf [file BSR-2019-1779_supp.pdf]

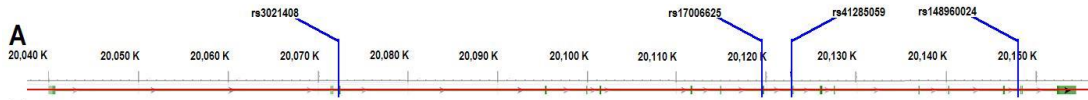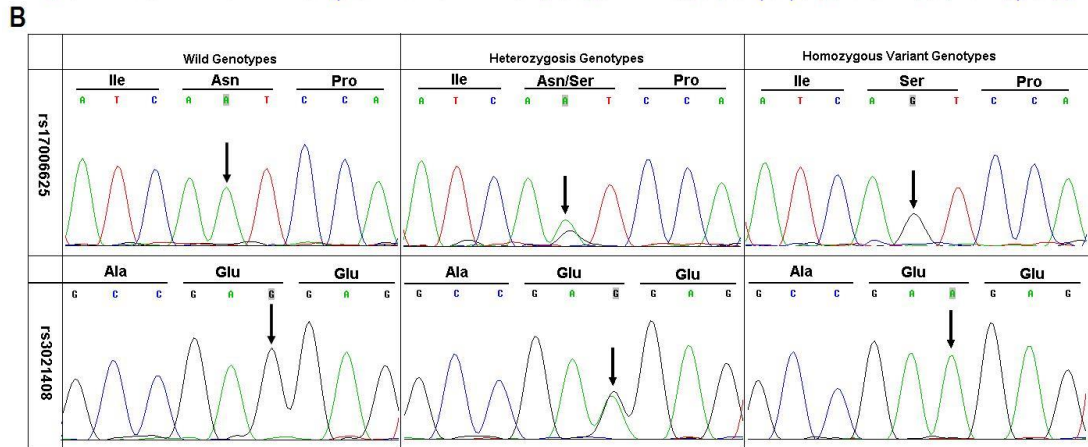

**Figure\_S1:** Schematic diagrams and DNA sequence chromatograms. A: Schematic diagrams of rs3021408, rs17006625, rs148960024 and rs41285059 locations in the *KAT2B* gene; B: Three genotypes of DNA sequence chromatograms of 17006625 and rs3021408.

**Table\_S1:** PCR primers used for *KAT2B* gene sequence analysis

| <i>Exon</i> | <i>Forward primer</i> | <i>Reverse primer</i> | <i>Size</i> | <i>T<sub>m</sub></i> |
|-------------|-----------------------|-----------------------|-------------|----------------------|
| 1           | GCCGCCACCACCATCAGC    | CGGGCGACAAGAGCACTTCC  | 670         | 65.4                 |
| 2           | AGGCTAAGGCTCAAGAAC    | CAAACCTCTGAGGGCAAAA   | 477         | 48.3                 |
| 3           | GGGTTACCTGATAGTTGC    | GGGAAGCCGTAGATAGAG    | 390         | 46.7                 |
| 4           | TGCTAATAACCACCAATC    | CTAGGCAGCCCTATACTT    | 366         | 48.1                 |
| 5           | CAAGTGGTGATGTAAGGGTA  | AAAGGGAACTGAGGGTCT    | 526         | 50.7                 |
| 6           | CCAGGGCTGCCCAACTAA    | GCCGCTTTCCTCACTATCC   | 538         | 51.9                 |
| 7           | AGTCCCTGCTGTCTTTAC    | ATCCTGGACATGCACAATCT  | 403         | 50.3                 |
| 8           | TGGGTTGGCAGTTATTGT    | AAGTGGACCTGTGATGTG    | 532         | 50.9                 |
| 9           | TCTCAAATGCTTTACCT     | CTATGGCTGACTTTCCT     | 507         | 49.2                 |
| 10          | ATGGGAGTGCTGATGACA    | CTAATCTGACCCGTGGAA    | 555         | 50.8                 |
| 11          | GGTCCTGGTTGGTAAAAT    | AACGCTACCTGAGAACAT    | 298         | 47.1                 |
| 12          | ACAGTGCCTGGAACATAG    | GATAACCCACAGCAAACC    | 349         | 48.9                 |
| 13          | CCCCTTTCTCCCATCTTA    | CACAAACCACGGCATTAC    | 297         | 48.1                 |
| 14          | CTGAAAGGTTGGTGTTC     | AGAGTTTTACCCTATTGC    | 485         | 46.2                 |
| 15-16       | GAGACAGGCTGGAAACCG    | CTTCCTACCCTAAGCAGA    | 630         | 49.2                 |
| 17          | GATTCCTTTCCCAGTCCC    | AAACTAAACCACCTTGCT    | 340         | 48.0                 |

**Table \_S2:** PCR primers used for SNP statistical analysis

| <i>SNP</i>             | <i>Direction</i> | <i>primer</i>        | <i>Size</i> | <i>T<sub>m</sub> ( °C)</i> |
|------------------------|------------------|----------------------|-------------|----------------------------|
| <i>rs3021408</i>       | <i>Forward</i>   | ATGGCTACAACCTCCGACAG | 412bp       | 51.2                       |
|                        | <i>Reverse</i>   | ACCACTTCATGGACACCC   |             |                            |
| <i>rs17006625</i>      | <i>Forward</i>   | GAGTTATAGTCCCTGCTGTC | 299bp       | 51.0                       |
|                        | <i>Reverse</i>   | CCTGGGTTTGCCTCAAGT   |             |                            |
| <i>rs14896002</i><br>4 | <i>Forward</i>   | GGGGCAGCGTTGTTAGTC   | 652bp       | 50.0                       |
|                        | <i>Reverse</i>   | CTTTGATGGCTCTTGGGT   |             |                            |
| <i>rs41285059</i>      | <i>Forward</i>   | GTTGGCGTGTATTATTTG   | 413bp       | 50.1                       |
|                        | <i>Reverse</i>   | AAGTGGACCTGTGATGTG   |             |                            |

**Table\_S3:** The genotype and allele frequency of SNP rs3021408 and rs17006625 in 400 CHD patients and 420 non-CHD controls

|            |          | <i>Group</i> | <i>Genotype frequency (%)</i> |           |           | <i>Allele frequency (%)</i> |           |
|------------|----------|--------------|-------------------------------|-----------|-----------|-----------------------------|-----------|
| rs3021408  | Genotype |              | C/C                           | C/T       | T/T       | C                           | T         |
|            | CHD      | 400          | 102(25.5)                     | 192(48.0) | 106(26.5) | 396(49.5)                   | 404(50.5) |
|            | Controls | 420          | 140(33.3)                     | 206(49.0) | 74(17.6)  | 486(57.9)                   | 354(42.1) |
| rs17006625 | Genotype |              | A/A                           | A/G       | G/G       | A                           | G         |
|            | CHD      | 400          | 316(79.0)                     | 80(20.0)  | 4(1.0)    | 712(89.0)                   | 88(11.0)  |
|            | Controls | 420          | 302(71.9)                     | 111(26.4) | 7(1.7)    | 715(85.1)                   | 125(14.9) |
